# Supplementary material
Source: publisher site journal article supplement (https://www.dovepress.com/article/312808)
Supplement: Supplementary file 1 [file get_supplementary_file.php]

**Table S1** Results of absolute values of systolic pressure, diastolic pressure, and heart rate over the course of time (0:00, 2:00, 4:00, and 6:00 am).

| **Outcome metrics** | **0:00** | **2:00** | **4:00** | **6:00** | **F** | **p** |
| --- | --- | --- | --- | --- | --- | --- |
| Systolic pressure | 106.71±10.64 | 106.50±11.62 | 107.08±11.11 | 104.76±11.64 | 1.504 | 0.217 |
| Diastolic pressure | 66.18±7.55 | 63.97±7.09 | 65.95±8.71 | 63.26±6.86 | 2.815 | 0.053 |
| Heart rate | 62.05±7.77 | 63.55±9.53 | 62.95±8.33 | 62.97±7.71 | 0.617 | 0.605 |

**Table S2** Results of relative values of ∆systolic pressure, ∆diastolic pressure, and ∆heart rate over time.

| **Outcome metrics** | **2:00-0:00** | **4:00-2:00** | **6:00-4:00** | **χ2 /F** | **p** |
| --- | --- | --- | --- | --- | --- |
| ∆Systolic pressure | -0.21±7.30 | 0.58±6.78 | -2.32±7.29 | 2.849 | 0.241 |
| ∆Diastolic pressure | -2.21±7.04 | 1.97±7.97 | -2.68±8.12 | 1.274 | 0.529 |
| ∆Heart rate | 1.50±6.15 | -0.61±6.54 | 0.03±7.51 | 1.743 | 0.418 |

**Table S3** Correlation analysis results: association of ∆systolic pressure, ∆diastolic pressure, and ∆heart rate with ∆PVT and ∆Subjective outcome metrics.

|  | | **PVT** | | | | |  | **Subjective** | | | | |
| --- | --- | --- | --- | --- | --- | --- | --- | --- | --- | --- | --- | --- |
| ∆Number of lapses | |  | ∆Mean 1/RT | |  | ∆Sleepiness | |  | ∆Fatigue | |
| r | p |  | r | p |  | r | p |  | r | p |
| ∆Systolic pressure | 0:00-2:00 | 0.263 | 0.111 | | -0.184 | 0.269 | | -0.116 | 0.487 | | 0.228 | 0.169 |
| 2:00-4:00 | -0.159 | 0.339 | | 0.263 | 0.111 | | 0.070 | 0.677 | | -0.010 | 0.954 |
| 4:00-6:00 | -0.104 | 0.533 | | 0.206 | 0.215 | | -0.280 | 0.089 | | 0.091 | 0.587 |
| ∆Diastolic pressure | 0:00-2:00 | 0.025 | 0.883 | | -0.099 | 0.556 | | 0.111 | 0.509 | | 0.204 | 0.102 |
| 2:00-4:00 | -0.191 | 0.252 | | 0.229 | 0.167 | | -0.035 | 0.834 | | -0.084 | 0.618 |
| 4:00-6:00 | 0.116 | 0.488 | | 0.056 | 0.740 | | -0.242 | 0.143 | | -0.317 | 0.052 |
| ∆Heart rate | 0:00-2:00 | 0.219 | 0.187 | | -0.019 | 0.911 | | 0.176 | 0.291 | | -0.180 | 0.279 |
| 2:00-4:00 | -0.143 | 0.390 | | 0.194 | 0.243 | | -0.239 | 0.149 | | -0.282 | 0.242 |
| 4:00-6:00 | 0.051 | 0.761 | | 0.093 | 0.578 | | -0.183 | 0.270 | | -0.122 | 0.208 |
